# Supplementary material for: Broaden sources and reduce expenditure: Tumor-specific transformable oxidative stress nanoamplifier enabling economized photodynamic therapy for reinforced oxidation therapy
Source: PubMed Central journal article supplement (PMC7482813; doi:10.7150/thno.49731), 2020-08-21
Supplement: thnov10p10513s1.pdf [file thnov10p10513s1.pdf]

## Supplementary material

### Broaden sources and reduce expenditure: tumor-specific transformable oxidative stress nanoamplifier enabling economized photodynamic therapy for reinforced oxidation therapy

Xiaoyu Xu<sup>1</sup>, Binyao Huang<sup>1</sup>, Zishan Zeng, Jie Chen, Zeqian Huang, Zilin Guan, Meixu Chen, Yanjuan Huang, Chunshun Zhao\*

*School of Pharmaceutical Sciences, Sun Yat-sen University, Guangzhou, 510006, P. R. China.*

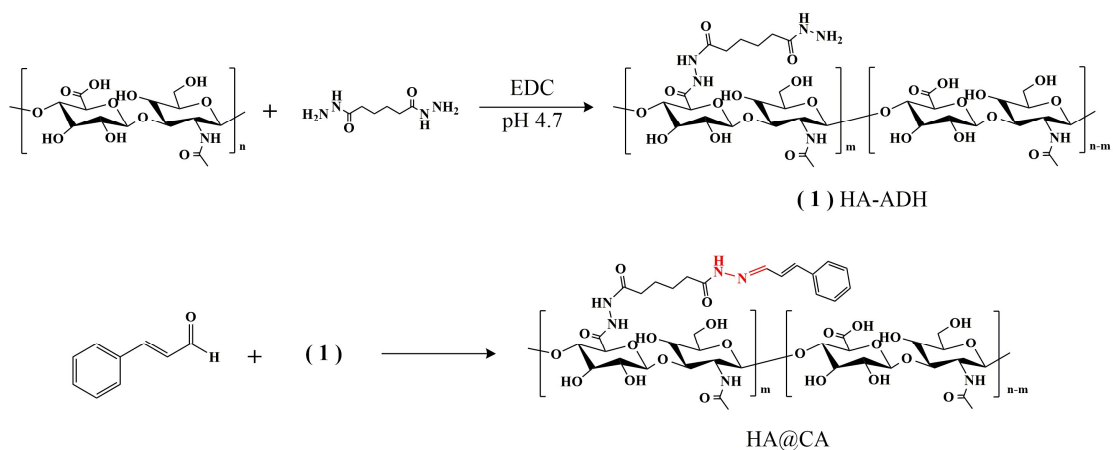

**Scheme S1.** The synthetic routes of HA@CA conjugates.

**Table S1.** The drug loading of CA in HA@CA under different CA feed ratio

|       | Feed ratio (m/m) | DL (m/m) |
|-------|------------------|----------|
| HA@CA | 3%               | 2.5%     |
|       | 5%               | 4.8%     |
|       | 8%               | 5.4%     |
|       | 10%              | 6.4%     |
|       | 15%              | 6.14%    |

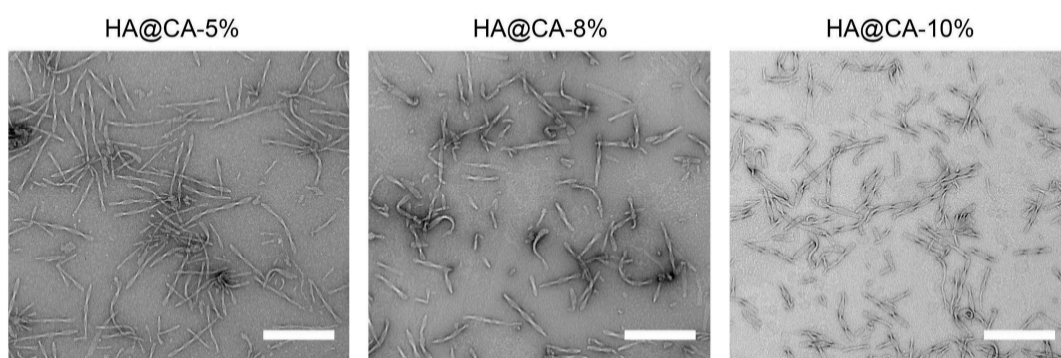

**Figure S1.** TEM images of HA@CA synthesized with different feeding rates of CA. Scale bar: 500 nm.

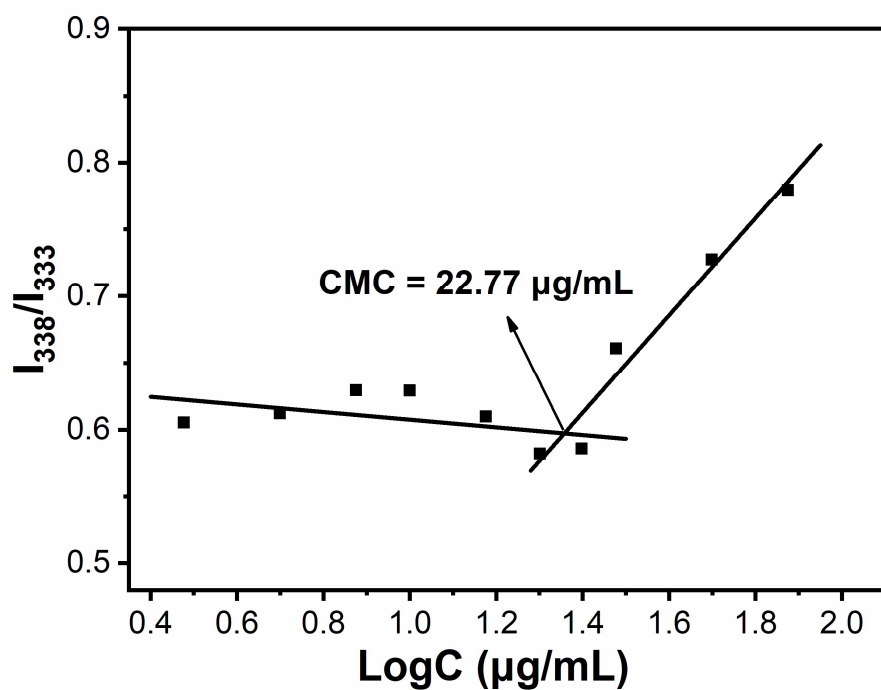

**Figure S2.** The critical micelle concentration (CMC) of HA@CA synthesized with feed ratio at 10%.

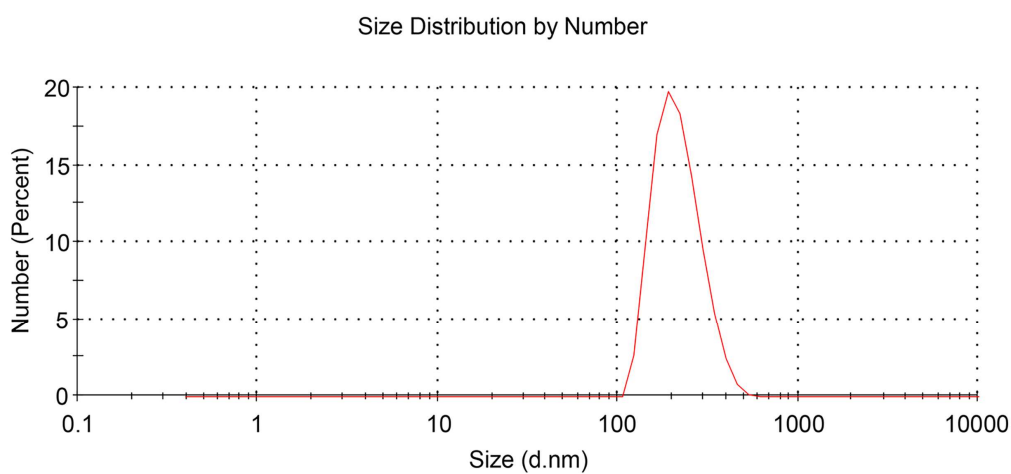

**Figure S3.** The hydrodynamic size distribution of HA@CAP measured by DLS.

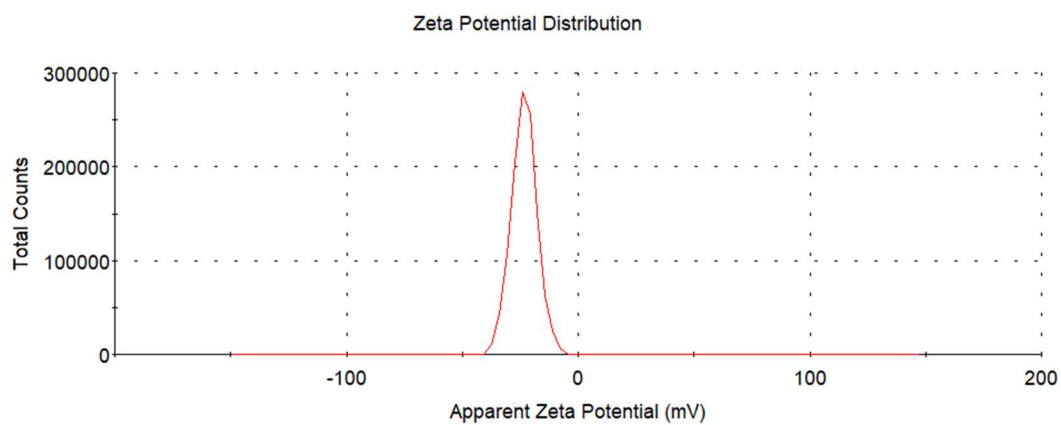

**Figure S4.** The zeta potentials of HA@CAP measured by DLS.

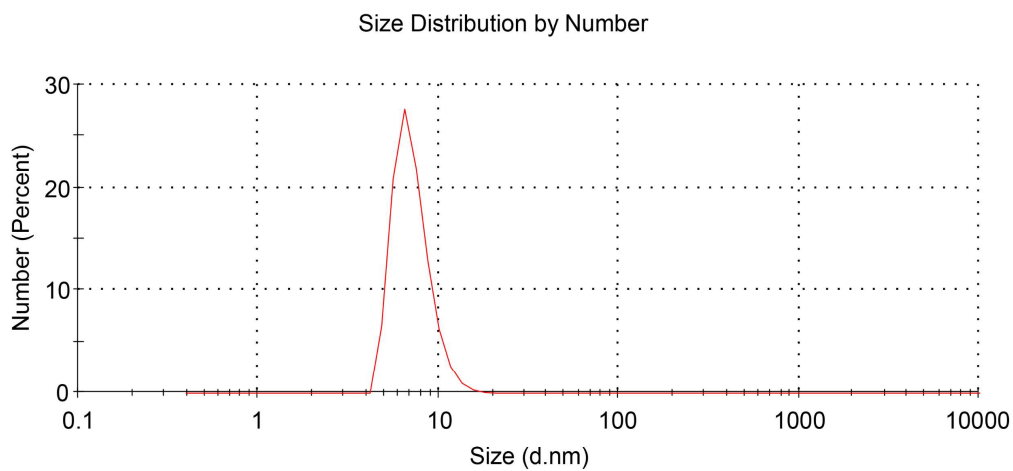

**Figure S5.** The hydrodynamic size distribution of completely disassembled HA@CAP in acidic conditions (pH 5.0) measured by DLS.

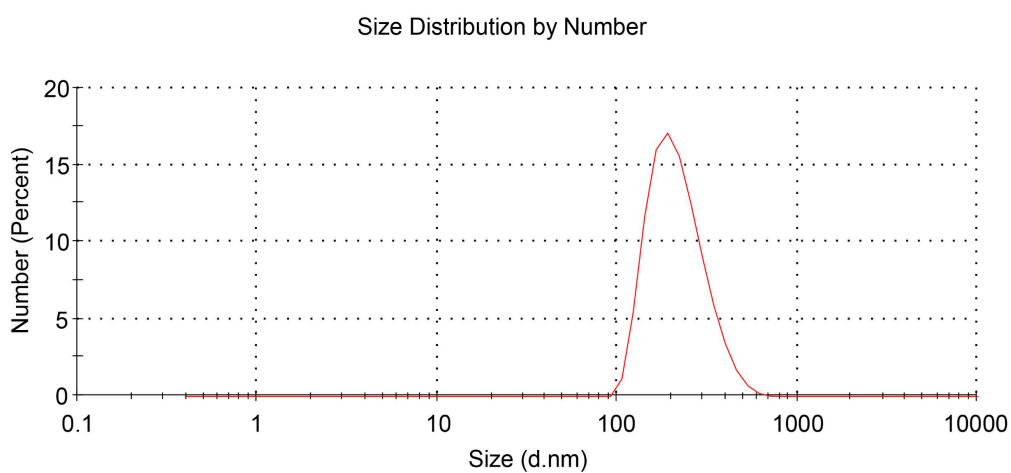

**Figure S6.** The hydrodynamic size distribution of HA@CAP immersed in normal physiological environment (pH 7.4) for 72 h.

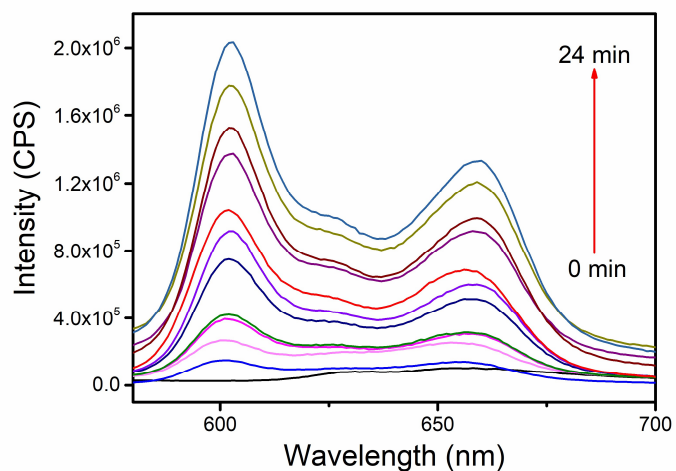

**Figure S7.** The fluorescence recovery phenomenon of HA@CAP after immersed in acidic environment for different times.

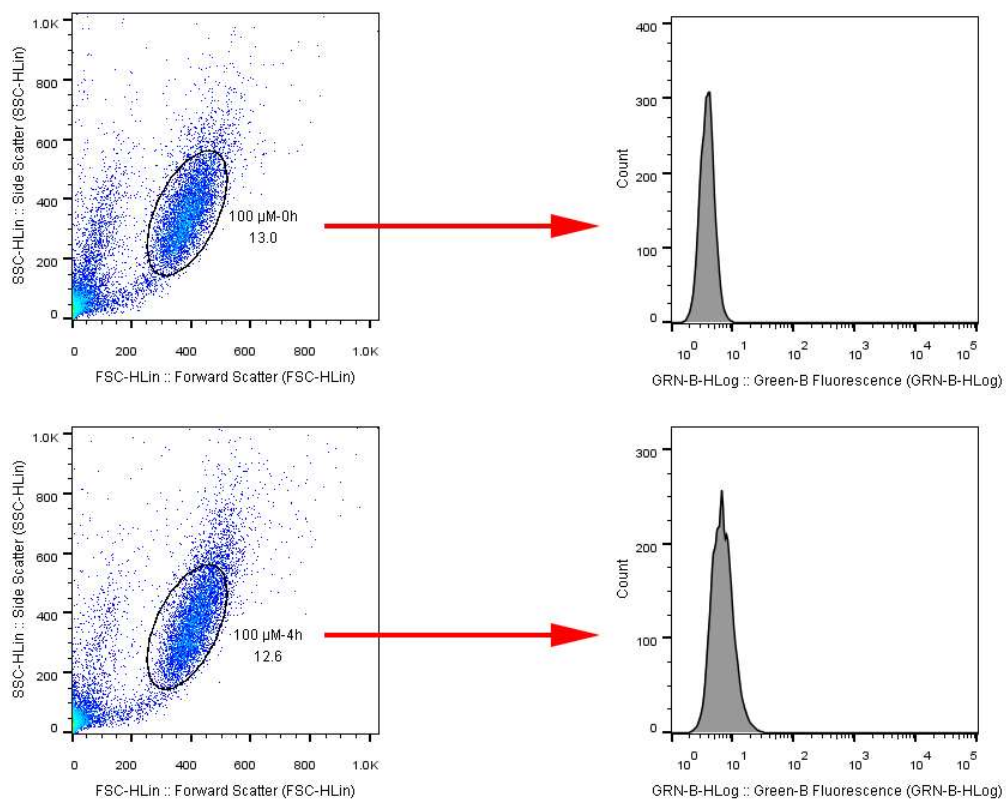

**Figure S8.** The representative gating strategy employed to obtain the histograms in Figure 4C.

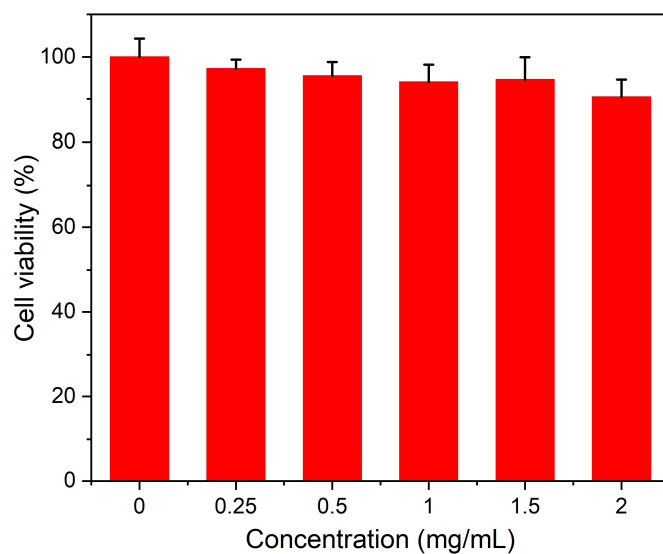

**Figure S9.** Cell viability of NIH-3T3 normal cells incubated with various concentrations of HA-ADH conjugates for 24 h.

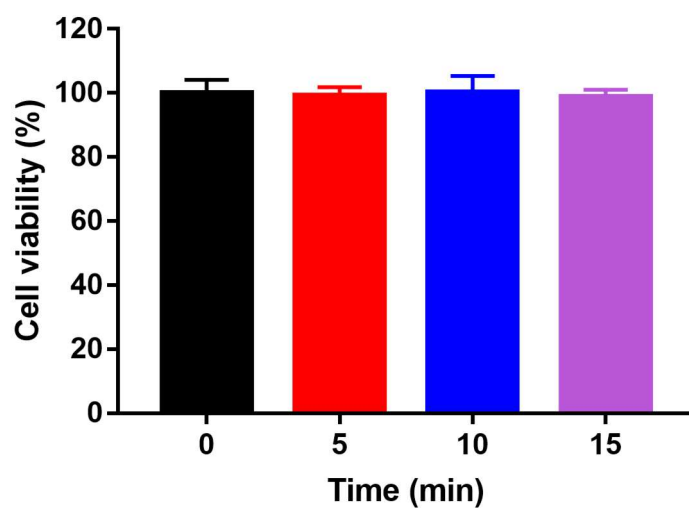

**Figure S10.** Cell viability of B16F10 cancer cells exposed to LED light irradiation ( $20 \text{ mW cm}^{-2}$ , 630 nm) for 0, 5, 10, and 15 min after incubation for 24 h.

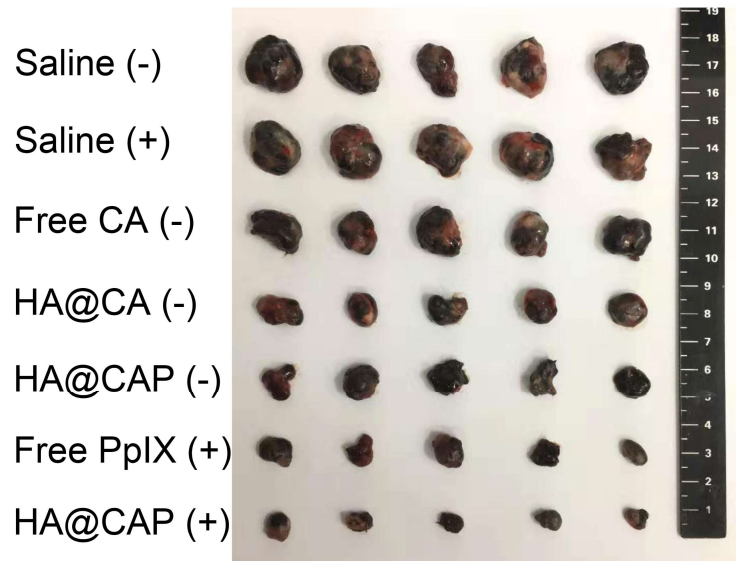

**Figure S11.** Representative images of excised tumor in various groups at the end of treatment.

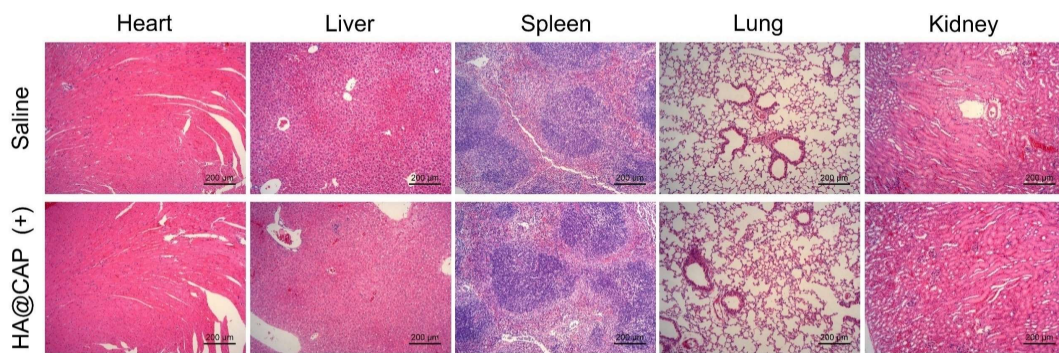

**Figure S12.** H&E staining of the major organs (heart, liver, spleen, lung, kidney) from saline group and HA@CAP with laser irradiation group at the end of antitumor treatment. Scale bar: 200  $\mu$ m.
